# Supplementary material for: Development of diffusive gradients in thin-films with mixed binding gels for in situ monitoring of artificial sweeteners in waters
Source: Royal Society of Chemistry journal article supplement (doi:10.1039/d2va00320a), 2023-01-01
Supplement: d2va00320a1.pdf [file d2va00320a1.pdf]

*Supplementary Materials for*

Development of Diffusive Gradients in Thin-films with Mixed  
Binding Gel for in-situ Monitoring of Artificial Sweeteners in  
Waters

Hussain Ijaz<sup>† #</sup>, Jin-Xin Zi<sup>† #</sup>, Si-Si Liu<sup>† \*</sup>, Qi-Si Cai<sup>†</sup>, Sheng-Ming Cheng<sup>†</sup>, Zhong-Xi  
Zhao<sup>†</sup>, Guang-Guo Ying<sup>†</sup>, Andy J. Sweetman<sup>‡</sup>, Chang-Er Chen<sup>† \*</sup>

<sup>†</sup> Environmental Research Institute/School of Environment, Guangdong Provincial Key  
Laboratory of Chemical Pollution and Environmental Safety & MOE Key Laboratory of  
Theoretical Chemistry of Environment, South China Normal University, Guangzhou 510006,  
China.

<sup>‡</sup> Lancaster Environment Centre, Lancaster University, Lancaster LA1 4YQ, U.K.

# these authors contributed equally to this work.

\* To whom correspondence should be addressed:

CE Chen: [changer.chen@m.scnu.edu.cn](mailto:changer.chen@m.scnu.edu.cn), +86 20 3931 1529

SS Liu: [sisi.liu@m.scnu.edu.cn](mailto:sisi.liu@m.scnu.edu.cn), +86 20 3931 1582

**MS Conditions for Chemical Analysis:**

Source temperature: 120 °C; Desolvation gas temperature: 300 °C; Desolvation gas: 800 L/h; Cone gas: 150 L/h; Scan mode: MRM; Ionization: ESI positive; Capillary voltage: 2.0 kV; Sampling cone: 40 V.

### **Extraction Procedures for Wastewater Samples from WWTP:**

All the water samples were filtered using 0.7  $\mu\text{m}$  glass fiber filters (GF/F, Whatman) before extraction, and the filtered samples were subsequently spiked with the relevant internal standard before. Final extracts were filtered using a 0.22  $\mu\text{m}$  membrane filter and stored at  $-18\text{ }^{\circ}\text{C}$  before analysis.

Chromabonds HR-X SPE cartridges (500 mg, 6 mL) were applied for the extraction of ASs. The SPE cartridges were preconditioned with 6 mL of methanol and 6 mL of Milli-Q water. Then, 500 mL of water samples were adjusted to pH =2 and passed through the cartridges at a flow rate of approximately 10 mL/min. Subsequently, the cartridges were rinsed with 10 mL of Milli-Q water and dried for 2 h under a vacuum. Finally, the SPE cartridges were eluted with methanol ( $2 \times 5\text{ mL}$ ). The eluent was evaporated to dryness and re-dissolved with 1 mL methanol.

Table S1 Basic information of selected Artificial Sweeteners.

| Compound        | CAS Number | Formula                                                        | Molecular Weight | p <i>K</i> <sub>a</sub> | Log <i>K</i> <sub>OW</sub> |
|-----------------|------------|----------------------------------------------------------------|------------------|-------------------------|----------------------------|
| Saccharin, SAC  | 82385-42-0 | C <sub>7</sub> H <sub>5</sub> NO <sub>3</sub> S                | 182.99           | 1.31                    | 0.91                       |
| Acesulfame, ACE | 33665-90-6 | C <sub>4</sub> H <sub>4</sub> NO <sub>4</sub> S                | 162.99           | 2.00                    | -1.33                      |
| Cyclamate, CYC  | 139-05-9   | C <sub>6</sub> H <sub>12</sub> NO <sub>3</sub> S               | 178.05           | 1.71                    | -1.61                      |
| Sucralose, SUC  | 56038-13-2 | C <sub>12</sub> H <sub>19</sub> Cl <sub>3</sub> O <sub>8</sub> | 396.01           | -3.0/11.8               | -1.00                      |

Table S2 Physical and chemical properties parameters of commonly used resins.

|                                       | <b>XAD18</b>                         | <b>XDA1</b>                    | <b>WAX</b>                     | <b>MAX</b>             | <b>HLB</b>                    |                        |
|---------------------------------------|--------------------------------------|--------------------------------|--------------------------------|------------------------|-------------------------------|------------------------|
|                                       | <b>Physical Properties</b>           |                                |                                |                        |                               |                        |
|                                       | Matrix                               | Macroporous, Crosslinked DVB   | Macroporous, crosslinked PDVB  | PS/DVB                 | PS/DVB                        | PNVP/DVB               |
|                                       | Type                                 | Adsorbent                      | Adsorbent                      | Ion exchange           | Ion exchange                  | Adsorbent              |
|                                       | Physical Form                        | White, opaque, spherical beads | Red brown, spherical particles | White, particles       | White or yellowish, particles | White, particles       |
| <b>Typical Properties</b>             | <b>Nitrogen BET</b>                  |                                |                                |                        |                               |                        |
|                                       | Surface Area                         | ~700 m <sup>2</sup> /g         | ~1100 m <sup>2</sup> /g        | ~600 m <sup>2</sup> /g | ~600 m <sup>2</sup> /g        | ~600 m <sup>2</sup> /g |
|                                       | Pore Diameter                        | ~150 Å                         | ~90 Å                          | ~300 Å                 | ~300 Å                        | ~300 Å                 |
|                                       | Exchange Intensity                   | -                              | -                              | 0.6 meq/g              | 0.9 meq/g                     | -                      |
| <b>Suggested Operating Conditions</b> | <b>Particle Size</b>                 |                                |                                |                        |                               |                        |
|                                       | Particle Diameter                    | 425 ± 50 um                    | 750 ± 50 um                    | 50 ± 5 um              | 50 ± 5 um                     | 40 ± 5 um              |
|                                       | Variable Coefficient                 | ≤ 1.7%                         | -                              | < 5%                   | < 5%                          | < 5%                   |
|                                       | Particle Density                     | 1.03 g/mL                      | 0.75 g/mL                      | -                      | 0.3 g/mL                      | -                      |
|                                       | <b>Maximum Operating Temperature</b> | 150°C (302°F)                  | 150°C (302°F)                  | 60°C (140°F)           | 60°C (140°F)                  | 60°C (140°F)           |
|                                       | <b>pH Range (Application)</b>        | 1-14                           | 1-14                           | 1-14                   | 1-14                          | 1-14                   |
|                                       | <b>pK<sub>a</sub></b>                | -                              | -                              | ~6                     | >18                           | -                      |
| <b>Storage Condition</b>              | room temperature                     | room temperature               | room temperature               | room temperature       | room temperature              |                        |

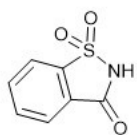

Saccharin (SAC)

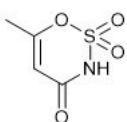

Acesulfame (ACE)

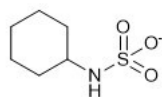

Cyclamate (CYC)

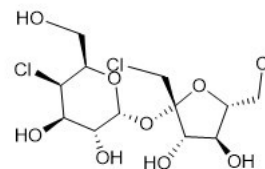

Sucralose (SUC)

**Fig S1.** Structures of four ASs investigated in the present study.

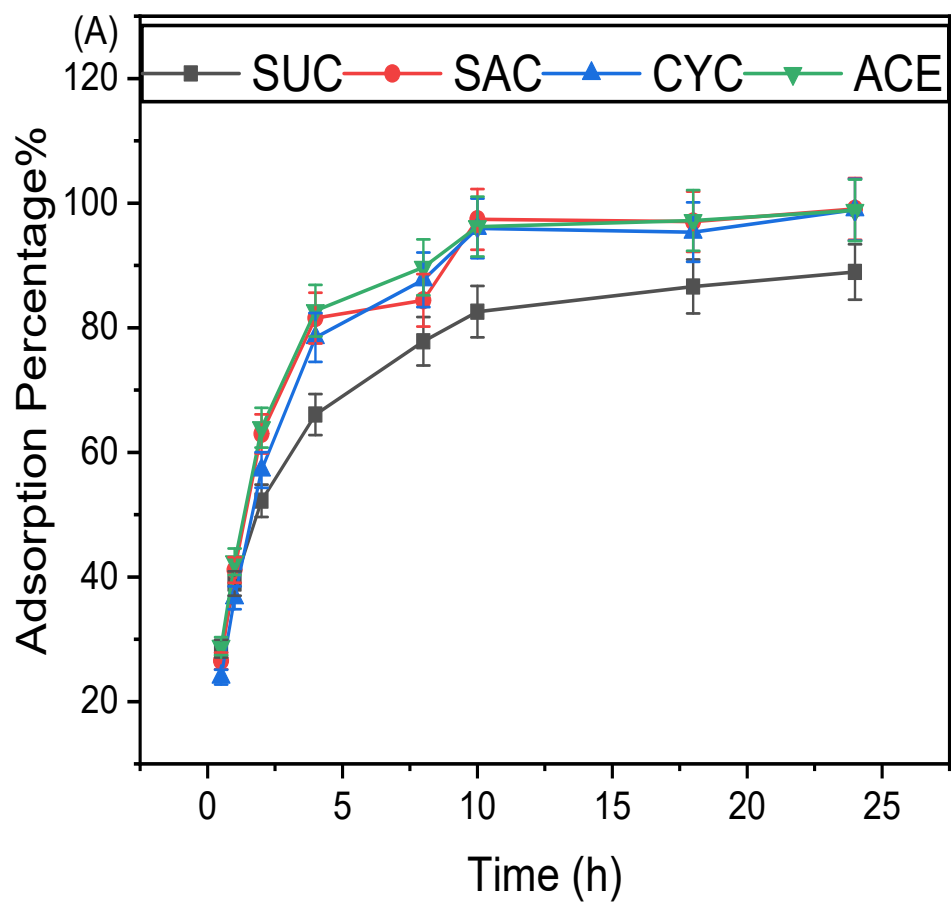

**Fig. S2.** Plot A: Uptake kinetics of SUC, SAC, CYC, and ACE onto WAX: XDA1 gels over the corresponding time in ASs solutions of  $100 \mu\text{g L}^{-1}$  10 mL.

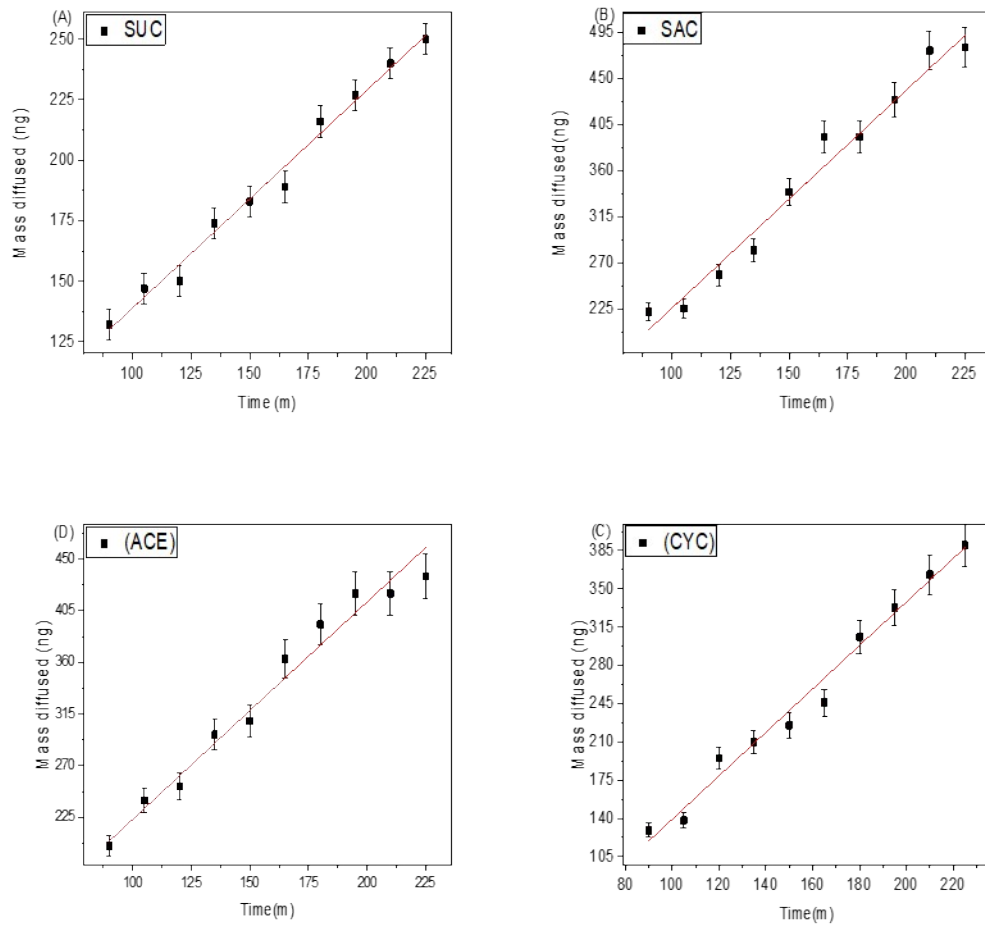

Fig. S3. AS masses diffused through PES (filter membrane) and Agarose (diffusive gel) at different intervals of time at 23°C, and ionic strength of 0.01 M. Error bars was calculated from the standard deviations of three replicates.
